# Supplementary material for: Gold Nanoparticle-Based Enzyme-Assisted Cyclic Amplification for the Highly-Sensitive Detection of miRNA-21
Source: MDPI journal article supplement (doi:10.3390/bios12090724), 2022-09-04
Supplement: s1 [file s1]

# Supplementary Materials

## Gold Nanoparticle-based Enzyme-assisted Cyclic Amplification for the Highly-sensitive Detection of miRNA-21

Yang Qing, Yuxing Yang, Ping Ouyang, Chenxin Fang, Haobin Fang, Yazhen Liao, Haiyu Li ,Zhencui Wang, Jie Du\*

State Key Laboratory of Marine Resource Utilization in South China Sea, College of Materials Science and Engineering, Hainan University, Haikou 570228, China

\*Corresponding author: dujie@hainanu.edu.cn

### 1. Materials

**Table S1** Synthesized Oligonucleotides sequences employed in this work

| Oligonucleotide | Sequence                                                      |
|-----------------|---------------------------------------------------------------|
| DNA-a           | 5'-Texas Red-ATGTTGATACGATTCCGGCGCAATCAACATCAGTCTGATAAGCTA-3' |
| DNA-b           | 5'-CGGGCCGAATCGTATAACCATTTT- C6 SH-3'                         |
| DNA-c           | 5'-CCCGGCCCGTTTTTTTTTTTTTTT -Biotin-3'                        |
| DNA-d           | 5'-TTGCGCCGGAATCGTATCAACAT-3'                                 |
| MiRNA-21        | UAG CUU AUC AGA CUG AUG UUG A                                 |
| MiRNA-16        | UAG CAG CAC GUA AAU AUU GGC G                                 |
| MiRNA-141       | UAA CAC UGU CUG GUA AAG AUG G                                 |
| MiRNA-205       | UCC UUC AUU CCA CCG GAG UCU GU                                |
| Let-7a          | UGA GGU AGU AGG UUG UAU AGU U                                 |
| MiRNA-221       | AGC UAC AUU GUC UGC UGG GUU UC                                |
| MiRNA-210       | CUG UGC GUG UGA CAG CGG CUG A                                 |

### 2 Characterization of AuNPs

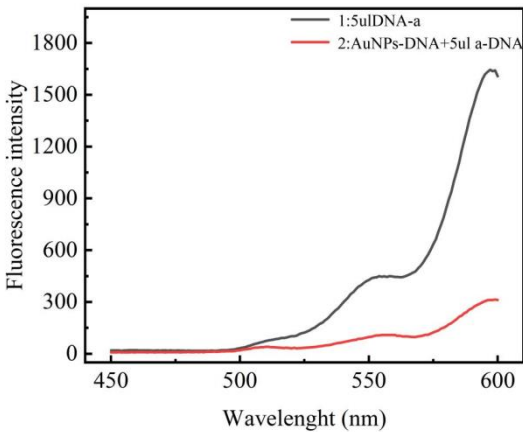

Figure S1. Excitation spectra at 620 nm before and after the reaction of AuNPs-DNA and Texas Red.

### 3. Feasibility study of the miRNA assay

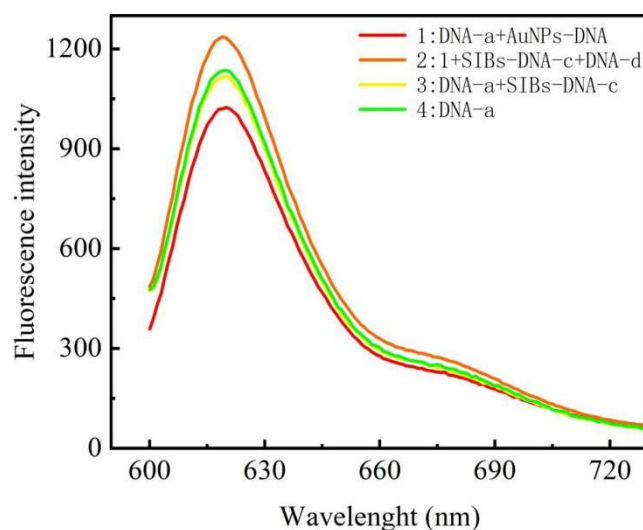

Figure S2. Effects of AuNPs-DNA and SIBs-DNA on fluorescence in the absence of miRNA-21.

### 4. Repeatability and longtime stability of biosensor

Table 2 is a t-test analysis table, which is analyzed by standard t-test results with a confidence level of 95% ( $\alpha=0.05$ ) on the data measured within one day and within a few days. The 10 groups of fluorescence data tested within one day are 946, 1008, 1008, 959, 996, 1023, 1046, 1001, 980, 1021; the 10 groups of data tested within a few days are 948, 985, 934, 1033, 1031, 1027, 1034, 958, 961, 931. The selected linear regression equation was substituted into the linear equation  $F_0 - F = 680.4C + 192.7$  ( $R^2 = 0.993$ ) with 1.2 nM as the test concentration, and the theoretical average value was 1009.18, the target number was 10, and the t value, P value and confidence interval were calculated. The results are shown in Table 2, and the P values are all greater than 0.05. The results show that the experiment is repeatable, and the two confidence intervals are not much different, indicating that the experimental results are within a certain range and have certain stability.

**Table S2** T-test analysis table. On the left is the analysis of 10 groups of experimental data in one day. On the right are 10 sets of experimental data analysis within a few days.

| In one day (Flourescence intensity) t-test | In a few days (Flourescence intensity) t-test |
|--------------------------------------------|-----------------------------------------------|
| $\alpha=0.05$                              | $\alpha=0.05$                                 |
| sample average=998.8                       | sample average=984.2                          |
| null average=1009.18                       | null average=1009.18                          |
| standard delviation=30.2096379             | standard delviation=43.16583011               |
| N=10                                       | N=10                                          |

$$t_1=1.086555298$$

$$t_2=1.830005255$$

$$P_1=0.305476152$$

$$P_2=0.100494771$$

$$\text{confidence interval}=[980.07, 1017.52]$$

$$\text{confidence interval}=[957.45, 1010.96]$$

## 5. Specificity analysis

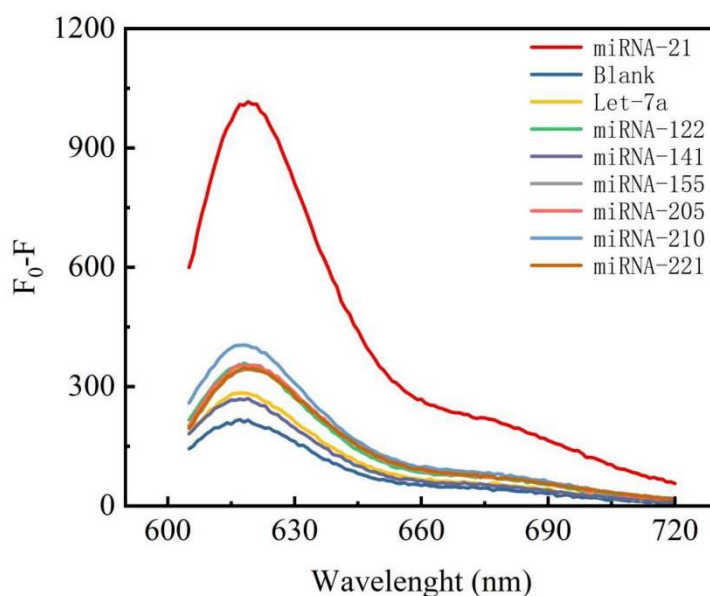

Figure S3. Experimental results Fluorescence values corresponding to various miRNAs.

## 6. Determination of target DNA in human serum samples

**Table S3** The t-test in the practical application of human serum. The p-values of the experimental results are all greater than 0.05, indicating that the 95% confidence interval is within the 95% confidence interval, indicating that it also has good feasibility in the practical application of human serum.

| Sample | Added (nM) | Found (nM) | t     | P     |
|--------|------------|------------|-------|-------|
| 1      | 0.24       | 0.218      | 1.502 | 0.272 |
|        |            | 0.221      |       |       |
|        |            | 0.244      |       |       |
|        |            | 0.538      |       |       |
| 2      | 0.54       | 0.525      | 2.462 | 0.133 |
|        |            | 0.525      |       |       |
|        |            | 0.747      |       |       |
|        |            | 0.753      |       |       |
| 3      | 0.75       | 0.750      | 0     | 1     |
|        |            | 0.750      |       |       |
